# Supplementary material
Source: HighWire-hosted journal article supplement (https://bmjopen.bmj.com/content/10/8/e037035)
Supplement: inline-supplementary-material-1 [file inline-supplementary-material-1.pdf]

Supplementary table 1: Gross and per capita impressions per race by age

| Race       | Total                       |                         |        | Child <16              |                         |      | Adult >16                   |                         |       |                        |                         |      |         |         |         |       |       |       |
|------------|-----------------------------|-------------------------|--------|------------------------|-------------------------|------|-----------------------------|-------------------------|-------|------------------------|-------------------------|------|---------|---------|---------|-------|-------|-------|
|            | Gross impressions (Million) | 95% Confidence Interval |        | Per Capita Impressions | 95% Confidence Interval |      | Gross impressions (Million) | 95% Confidence Interval |       | Per Capita Impressions | 95% Confidence Interval |      |         |         |         |       |       |       |
| Australia  | 170.91                      | 153.96                  | 187.87 | 2.57                   | 2.32                    | 2.83 | 8.47                        | 6.81                    | 10.14 | 0.67                   | 0.54                    | 0.80 | 995.23  | 962.19  | 1028.26 | 18.50 | 17.88 | 19.11 |
| Bahrain    | 61.65                       | 65.86                   | 66.45  | 0.93                   | 0.86                    | 1.00 | 3.70                        | 3.17                    | 4.22  | 0.29                   | 0.25                    | 0.33 | 353.73  | 345.15  | 362.31  | 6.57  | 6.42  | 6.73  |
| China      | 213.08                      | 192.98                  | 233.19 | 3.21                   | 2.91                    | 3.51 | 8.54                        | 6.79                    | 10.32 | 0.68                   | 0.54                    | 0.82 | 1264.72 | 1225.82 | 1303.63 | 23.51 | 22.78 | 24.23 |
| Azerbaijan | 268.28                      | 247.49                  | 289.07 | 4.04                   | 3.73                    | 4.35 | 17.55                       | 15.20                   | 19.91 | 1.39                   | 1.21                    | 1.58 | 1528.01 | 1490.98 | 1565.04 | 28.40 | 27.71 | 29.09 |
| Spain      | 132.58                      | 121.36                  | 143.81 | 2.00                   | 1.83                    | 2.17 | 6.21                        | 5.13                    | 7.28  | 0.49                   | 0.41                    | 0.58 | 752.84  | 732.14  | 773.54  | 13.99 | 13.61 | 14.38 |
| Monaco     | 358.17                      | 327.80                  | 388.53 | 5.39                   | 4.94                    | 5.85 | 12.29                       | 9.80                    | 14.78 | 0.98                   | 0.78                    | 1.17 | 2105.66 | 2049.07 | 2162.26 | 39.14 | 38.09 | 40.19 |
| Canada     | 129.43                      | 113.82                  | 145.03 | 1.95                   | 1.71                    | 2.18 | 2.60                        | 1.63                    | 3.58  | 0.21                   | 0.13                    | 0.28 | 751.62  | 720.08  | 783.15  | 13.97 | 13.38 | 14.56 |
| France     | 23.50                       | 20.84                   | 26.17  | 0.35                   | 0.31                    | 0.39 | 0.51                        | 0.34                    | 0.69  | 0.04                   | 0.03                    | 0.05 | 134.46  | 129.15  | 139.76  | 2.50  | 2.40  | 2.60  |
| Austria    | 169.89                      | 153.08                  | 186.69 | 2.56                   | 2.31                    | 2.81 | 6.94                        | 5.45                    | 8.44  | 0.55                   | 0.43                    | 0.67 | 993.01  | 960.25  | 1025.76 | 18.46 | 17.85 | 19.07 |
| Britain    | 370.60                      | 341.39                  | 399.80 | 5.58                   | 5.14                    | 6.02 | 17.42                       | 14.61                   | 20.23 | 1.38                   | 1.16                    | 1.61 | 2140.79 | 2088.19 | 2193.39 | 39.79 | 38.81 | 40.77 |
| German     | 185.28                      | 169.60                  | 200.96 | 2.79                   | 2.55                    | 3.03 | 5.57                        | 4.36                    | 6.77  | 0.44                   | 0.35                    | 0.54 | 1077.65 | 1048.54 | 1106.76 | 20.03 | 19.49 | 20.57 |
| Hungarian  | 139.10                      | 126.54                  | 151.66 | 2.09                   | 1.91                    | 2.28 | 5.15                        | 4.08                    | 6.22  | 0.41                   | 0.32                    | 0.49 | 788.15  | 764.51  | 811.79  | 14.65 | 14.21 | 15.09 |
| Belgium    | 357.95                      | 328.96                  | 386.94 | 5.39                   | 4.95                    | 5.83 | 12.07                       | 9.71                    | 14.44 | 0.96                   | 0.77                    | 1.15 | 2143.36 | 2090.07 | 2196.66 | 39.84 | 38.85 | 40.83 |
| Italy      | 253.27                      | 232.28                  | 274.26 | 3.81                   | 3.50                    | 4.13 | 10.77                       | 8.85                    | 12.69 | 0.85                   | 0.70                    | 1.01 | 1477.27 | 1438.58 | 1515.97 | 27.46 | 26.74 | 28.18 |
| Singapore  | 327.03                      | 298.79                  | 355.28 | 4.93                   | 4.50                    | 5.35 | 11.34                       | 9.01                    | 13.67 | 0.09                   | 0.72                    | 1.09 | 1886.64 | 1833.94 | 1939.34 | 35.07 | 34.09 | 36.05 |
| Russia     | 93.96                       | 85.08                   | 102.84 | 1.42                   | 1.28                    | 1.55 | 4.73                        | 3.86                    | 5.61  | 0.38                   | 0.31                    | 0.45 | 535.42  | 518.47  | 552.37  | 9.95  | 9.64  | 10.27 |
| Japan      | 81.51                       | 70.29                   | 92.74  | 1.23                   | 1.06                    | 1.40 | 4.84                        | 3.64                    | 6.04  | 0.38                   | 0.29                    | 0.48 | 454.81  | 432.13  | 477.48  | 8.45  | 8.03  | 8.88  |
| USA        | 285.63                      | 263.68                  | 307.59 | 4.30                   | 3.97                    | 4.63 | 8.48                        | 6.80                    | 10.16 | 0.67                   | 0.54                    | 0.81 | 1642.94 | 1604.88 | 1683.01 | 30.56 | 29.83 | 31.28 |
| Mexico     | 113.24                      | 98.16                   | 128.33 | 1.71                   | 1.48                    | 1.93 | 2.96                        | 1.89                    | 4.03  | 0.23                   | 0.15                    | 0.32 | 651.52  | 620.74  | 682.31  | 12.11 | 11.54 | 12.68 |
| Brazil     | 129.62                      | 112.77                  | 146.47 | 1.95                   | 1.70                    | 2.21 | 1.70                        | 0.85                    | 2.55  | 0.14                   | 0.07                    | 0.20 | 739.06  | 704.91  | 773.21  | 13.74 | 13.10 | 14.37 |
| Abu Dhabi  | 61.55                       | 56.13                   | 66.97  | 0.93                   | 0.85                    | 1.01 | 2.49                        | 2.01                    | 2.97  | 0.20                   | 0.16                    | 0.24 | 349.78  | 339.66  | 359.90  | 6.50  | 6.31  | 6.69  |
